# Supplementary material
Source: Elsevier journal article supplement (https://www.sciencedirect.com/science/article/pii/S0870255117300173)

**Tabela Suplementar 1.** Número de cintigrafias com MIBG realizadas por doente.

| **Número de cintigrafias MIBG por doente** | **Frequência** | **Frequência relativa (%)** |
| --- | --- | --- |
| 1 | 101 | 43,5 |
| 2 | 58 | 25,0 |
| 3 | 22 | 9,5 |
| 4 | 15 | 6,5 |
| 5 | 20 | 8,6 |
| 6 | 3 | 1,3 |
| 7 | 8 | 3,4 |
| 8 | 4 | 1,7 |
| 9 | 1 | 0,4 |

**Tabela Suplementar 2.** Variação do índice C/M em função da idade e da duração dos sintomas.

| **Variável** | **Idade** | | | | | **Duração de sintomas** | | | | |
| --- | --- | --- | --- | --- | --- | --- | --- | --- | --- | --- |
| Correlação de Pearson | | | Correlação de Spearman | | Correlação de Pearson | | | Correlação de Spearman | |
| R | R 2 | Valor de P | Rho | Valor  de P | R | R 2 | Valor  de P | Rho | Valor  de P |
| Índice C/M precoce | -0,308 | 0,095 | <0,001 | -0,258 | <0,001 | -0,201 | 0,040 | <0,001 | -0,225 | <0,001 |
| Índice C/M tardio | -0,287 | 0,082 | <0,001 | -0,247 | <0,001 | -0,257 | 0,066 | <0,001 | -0,275 | <0,001 |
| Washout do MIBG | 0,097 | 0,009 | 0,023 | 0,073 | NS (0,086) | 0,153 | 0,024 | 0,002 | 0,162 | 0,001 |

**Tabela Suplementar 3.** Causas de morte.

| **Causa de morte** | **Total**  **N=47** | **Doentes não transplantados**  **N=30** | **Doentes transplantados**  **N=17** |
| --- | --- | --- | --- |
| Estadio terminal da doença com caquexia e falência multiorgão | 22 (47%) | 19 (63%) | 3 (18%) |
| Complicações infecciosas | 9 (19%) | 7 (23%) | 2 (12%) |
| Acidente vascular cerebral ou hemorragia intracraniana | 3 (6%) | 3 (10%) | 0 |
| Complicações peri-operatórias da transplantação hepática | 6 (13%) | -- | 6 (35%) |
| Rejeição aguda do transplante hepático | 3 (6%) | -- | 3 (18%) |
| Rejeição crónica do transplante hepático | 3 (6%) | -- | 3 (18%) |
| Outras causas não relacionáveis com a PAF | 1 (2%) | 1 (3%) | 0 |

**Figura Suplementar 1. A.** Variação do índice coração-mediastino tardio em função da idade em ambos os sexos; **B.** Sobrevivência a longo prazo em função da distribuição por quartis do índice coração-mediastino tardio em ambos os sexos.


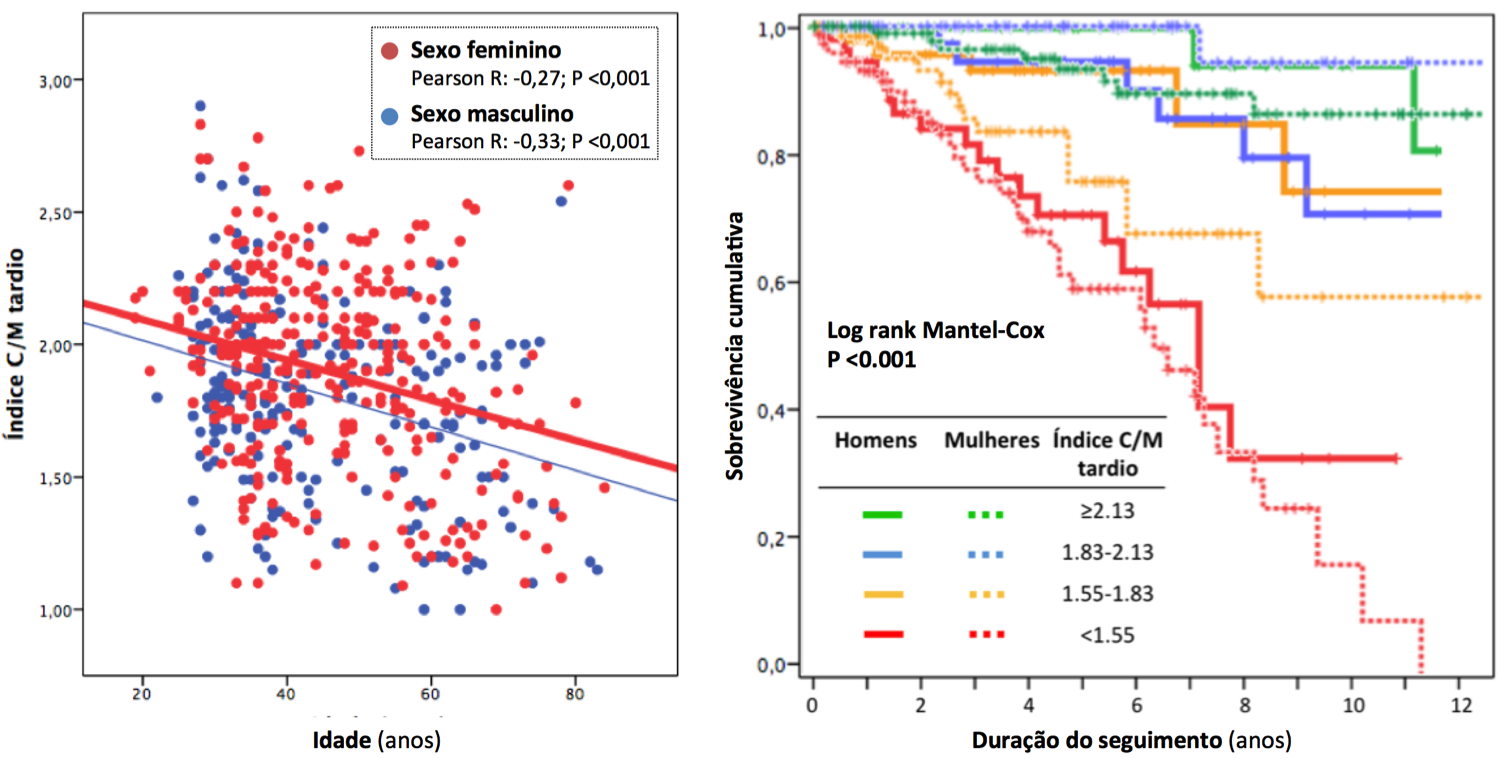

Supplement: mmc1 [file S0870255117300173:mmc1.docx]
